# Supplementary material for: The enhanced performance of a Si–As–Se ovonic threshold switching selector
Source: Royal Society of Chemistry journal article supplement (doi:10.1039/d1tc02730a), 2021-01-01
Supplement: d1tc02730a1.pdf [file d1tc02730a1.pdf]

## Enhanced performance of Si-As-Se ovonic threshold switching selector

Zhenhui Yuan<sup>a,b</sup>, Xiaodan Li<sup>a,b</sup>, Sannian Song<sup>a,b\*</sup>, Zhitang Song<sup>a,b\*</sup>, Jiawei Zha<sup>c</sup>, Gang Han<sup>c</sup>, Bingjun Yang<sup>c</sup>, Takehito Jimbo<sup>d</sup>, Koukou Suu<sup>c, d</sup>

<sup>a</sup>State Key Laboratory of Functional Materials for Informatics, Shanghai Institute of Microsystem and Information Technology, Chinese Academy of Sciences, Shanghai 200050, China

<sup>b</sup>Center of Materials Science and Optoelectronics Engineering, University of Chinese Academy of Sciences, Beijing 100049, China

<sup>c</sup>ULVAC Research Center Suzhou Co., Ltd, Suzhou 215026, China

<sup>d</sup>ULVAC, Inc., Kanagawa 253-8543, Japan

\* Electronic mail: [songsannian@mail.sim.ac.cn](mailto:songsannian@mail.sim.ac.cn), [ztsong@mail.sim.ac.cn](mailto:ztsong@mail.sim.ac.cn)

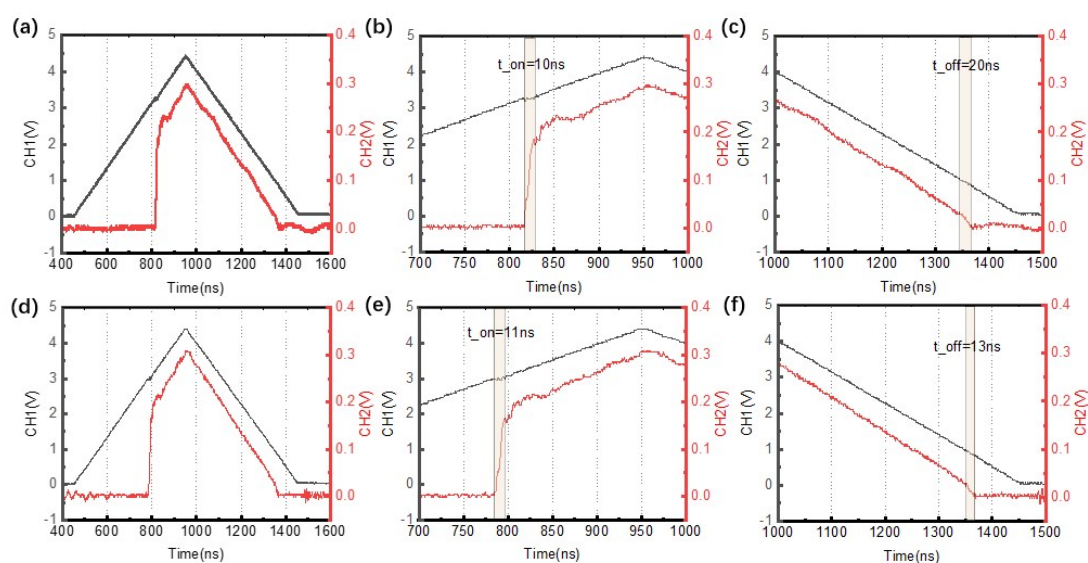

**Fig.1.** (a) and(d) Typical dynamical responses of the  $\text{As}_{43}\text{Se}_{57}$  and  $\text{Si}_9\text{As}_{39}\text{Se}_{52}$  based device under triangular voltage pulse respectively. (b) and(c) are the magnification version of ON and OFF switching edges for  $\text{As}_{43}\text{Se}_{57}$ . (e) and(f) are the magnification version of ON and OFF switching edges for  $\text{Si}_9\text{As}_{39}\text{Se}_{52}$ .
